# Supplementary material for: The direct-writing of low cost paper based flexible electrodes and touch pad devices using silver nano-ink and ZnO nanoparticles
Source: Royal Society of Chemistry journal article supplement (doi:10.1039/c9ra02599e), 2019-01-01
Supplement: c9ra02599e1.pdf [file c9ra02599e1.pdf]

**Direct-Writing of Low Cost Paper Based Flexible Electrode and Touch Pad  
Devices using Silver Nano-Ink and ZnO Nanoparticles**

**Kamlesh Shrivastava<sup>1,2\*</sup>, Archana Ghosale<sup>1</sup>, Tushar Kant<sup>2</sup>, P. K. Bajpai<sup>3</sup> and Ravi Shankar<sup>4</sup>**

**<sup>1</sup>Department of Chemistry, Guru Ghasidas Vishwavidyalaya, Koni, Bilaspur, CG**

**<sup>2</sup>School of Studies in Chemistry, Pt. Ravishankar Shukla University, Raipur-492010, CG,  
India**

**<sup>3</sup>Department of Pure and Applied Physics, Guru Ghasidas Vishwavidyalaya, Koni,  
Bilaspur, CG**

**<sup>4</sup>Nanoscience and Nanoengineering Program, South Dakota School of Mines and  
Technology, Rapid City, South Dakota-57701, USA**

**\*Corresponding author**

**Email: [kshrivas@gmail.com](mailto:kshrivas@gmail.com)**

**Table S1.** Percentage of settlement of ink after adding different stabilizing agent and stability over period of time

| Stabilizer         | Percentage of settling of ink |         |         |         |         |
|--------------------|-------------------------------|---------|---------|---------|---------|
|                    | 7 days                        | 14 days | 21 days | 28 days | 35 days |
| AgNPs/Ino+PVP      | 0.9                           | 2.5     | 5.5     | 8.5     | 10.2    |
| AgNPs/Ino+PVA      | 1.9                           | 6.5     | 10.5    | 12.2    | 20.0    |
| AgNPs/Ino+Chitosan | 4.2                           | 9.4     | 14.8    | 20.2    | 25.1    |

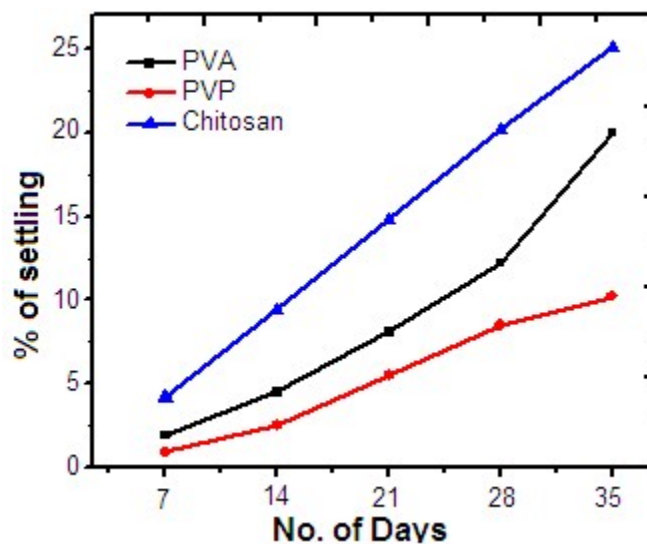

**Fig. S1.** The comparative study of settling down of ink stabilized by different stabilizers (PVA, PVP and chitosan) with time

**Table. S2.** Resistance values after varying the sintering temperature with 15 min of sintering time using photo paper of dimension 1x1 cm

| Temp.<br>(°C) | Measured Resistance ( $\Omega$ ) |                   |                |                     |
|---------------|----------------------------------|-------------------|----------------|---------------------|
|               | AgNPs/Ino                        | AgNPs/Ino<br>+PVP | AgNPs/Ino +PVA | AgNPs/Ino +Chitosan |
| 25            | 16.4                             | 16.8              | 16.8           | 16.9                |
| 40            | 1.2                              | 1.7               | 3.2            | 3.8                 |
| 60            | 4.3                              | 4.2               | 4.7            | 5.2                 |
| 80            | 4.9                              | 5.3               | 7.8            | 8.6                 |
| 100           | 5.8                              | 6.4               | 8.6            | 9.3                 |

**Table S3.** Resistance values after varying the sintering time with 40°C of temperature using photo paper of dimension 1x1 cm

| Time<br>(min) | Measured Resistance ( $\Omega$ ) |                |                |                     |
|---------------|----------------------------------|----------------|----------------|---------------------|
|               | AgNPs/Ino                        | AgNPs/Ino +PVP | AgNPs/Ino +PVA | AgNPs/Ino +Chitosan |
| 5             | 9.1                              | 9.8            | 10.2           | 10.5                |
| 10            | 2.4                              | 2.6            | 9.6            | 7.2                 |
| 15            | 1.3                              | 1.6            | 6.2            | 5.4                 |
| 20            | 3.6                              | 3.8            | 6.5            | 6.0                 |
| 25            | 4.5                              | 5.7            | 5.9            | 6.2                 |
| 30            | 6.6                              | 8.2            | 7.5            | 6.8                 |
